# Supplementary material for: Health Care Resource Utilization and Costs for Patients with Spinal Muscular Atrophy: Findings from a Retrospective US Claims Database Analysis
Source: Springer Nature journal article supplement (doi:10.1007/s12325-023-02621-y), 2023-08-16
Supplement: MOESM1 [file 25928562]

**Health Care Resource Utilization and Costs for Patients with Spinal Muscular Atrophy:  
Findings from a Retrospective US Claims Database Analysis**

Walter Toro<sup>1</sup>; Min Yang<sup>2</sup>; Mihaela Georgieva<sup>2</sup>; Wei Song<sup>2</sup>; Anish Patel<sup>1</sup>; Anya (Xinyi) Jiang<sup>2</sup>;  
Angela Zhao<sup>2</sup>; Nicole LaMarca<sup>1</sup>; Omar Dabbous<sup>1</sup>

<sup>1</sup>Novartis Gene Therapies, Inc., Bannockburn, Illinois, USA; <sup>2</sup>Analysis Group, Inc., Boston,  
Massachusetts, USA

**Corresponding author:**

Walter Toro, MD, PhD

Novartis Gene Therapies, Inc.

2275 Half Day Road, Suite 200

Bannockburn, IL 60015, USA

E-mail: [walter.toro\\_jimenez@novartis.com](mailto:walter.toro_jimenez@novartis.com)

## Supplemental Material

Table S1. List of codes to identify patients treated with onasemnogene abeparvovec, nusinersen, or risdiplam.

| Treatment                | Code type     | Codes         |
|--------------------------|---------------|---------------|
| Onasemnogene abeparvovec | NDC           | 71894-0110-01 |
|                          |               | 71894-0115-01 |
|                          |               | 71894-0120-02 |
|                          |               | 71894-0121-03 |
|                          |               | 71894-0122-03 |
|                          |               | 71894-0123-03 |
|                          |               | 71894-0124-04 |
|                          |               | 71894-0125-04 |
|                          |               | 71894-0126-04 |
|                          |               | 71894-0127-05 |
|                          |               | 71894-0128-05 |
|                          |               | 71894-0129-05 |
|                          | 71894-0130-06 |               |
|                          | HCPCS         | J3399         |
| Nusinersen               | NDC           | 64406-058-01  |
|                          |               | 71860-396-01  |
|                          | HCPCS         | C9489         |
|                          |               | J2326         |
| Risdiplam                | NDC           | 50242-0175-05 |
|                          |               | 50242-0175-07 |

**Abbreviations:** HCPCS: Healthcare Common Procedure Coding System; NDC: National Drug Code.

Table S2. List of codes to identify SMA-related comorbidities.

| <b>Comorbidities</b>                   | <b>ICD-10-CM codes</b> |
|----------------------------------------|------------------------|
| Muscle weakness (generalized)          | M62.81                 |
| Dyspnea and respiratory anomalies      | R06.x                  |
| Failure to thrive                      | P92.6, R62.51, R62.7   |
| Dysphagia, unspecified                 | R13.10                 |
| Feeding difficulties and mismanagement | R63.3                  |
| Acute respiratory failure              | J96.0x, J96.2x         |
| Scoliosis                              | M41.x                  |

**Abbreviations:** ICD-10-CM: International Classification of Diseases, Tenth Revision, Clinical Modification.
